# Supplementary material
Source: PubMed Central journal article supplement (PMC4890184)
Supplement: NIHMS787505-supplement-01.pdf [file NIHMS787505-supplement-01.pdf]

Supplementary Table 1. Criteria used for the diagnosis of GHD in the study population <sup>19</sup>. Eligible study subjects fulfilled any one of these criteria.

| <b>Diagnostic test</b>           | <b>Diagnostic cutpoint</b>                                     |                     |
|----------------------------------|----------------------------------------------------------------|---------------------|
| Insulin tolerance test           | Peak GH <3 mcg/l                                               |                     |
| Glucagon stimulation test        | Peak GH <3 mcg/l                                               |                     |
| GHRH + arginine stimulation test | If BMI <25 kg/m <sup>2</sup>                                   | Peak GH <11.5 mcg/l |
|                                  | If BMI 25-30 kg/m <sup>2</sup>                                 | Peak GH <8 mcg/l    |
|                                  | If BMI >30 kg/m <sup>2</sup>                                   | Peak GH <4.2 mcg/l  |
| Arginine stimulation test        | Peak GH <0.4 mcg/l                                             |                     |
| IGF-1                            | IGF-1 SDS <-2 and ≥3 additional pituitary hormone deficiencies |                     |

Abbreviations: BMI: body mass index; GH: growth hormone; GHRH: growth hormone releasing hormone; IGF-1: insulin-like growth factor 1; SDS: standard deviation score.
